# Supplementary material
Source: publisher figshare collection journal article supplement (https://acs.figshare.com/ndownloader/files/3818110)
Supplement: Supplementary file 1 [file 3818110]

# Fluorenylidene functionalized lithium phosphonium di- and triylides

*Fabian G. Schröder and Jörg Sundermeyer\**

Fachbereich Chemie der Philipps-Universität Marburg, Hans-Meerwein-Str.,  
35032 Marburg, Germany

**Content:**

- S2 Characterization and Single Crystal X-ray Analysis of  $[\text{Me}_3\text{P}^+-\text{FluH}]\text{Br}^-$  (1).
- S2 Characterization and Single Crystal X-ray Analysis of  $[\text{Me}_3\text{P}=\text{Flu}]$  (2).
- S4 Table S1. Crystallographic data for Compounds 1-4
- S5-11 NMR spectra of Compounds 1-4
- S12 References

**Characterization and Single Crystal X-ray Analysis of [Me<sub>3</sub>P<sup>+</sup>-FluH]Br<sup>−</sup> (1).** **1** gives rise to a <sup>31</sup>P NMR resonance at 30.8 ppm. The phosphorus bound methyl groups in **1** give rise to a doublet at 2.10 ppm and a <sup>2</sup>*J*<sub>HP</sub> coupling constant of 13.7 Hz in the proton NMR spectrum and a doublet at 8.0 ppm (<sup>1</sup>*J*<sub>CP</sub> = 54.4 Hz) in the <sup>13</sup>C NMR spectrum, respectively. The carbon atom in 9-position of the fluorene moiety is observed at 43.0 ppm (<sup>1</sup>*J*<sub>CP</sub> = 46.0 Hz) the proton 9-position is downfield shifted to 6.26 ppm and shows a <sup>2</sup>*J*<sub>HP</sub> coupling constant of 19.5 Hz.

Single crystals of **1** were obtained by slow evaporation of a supernatant solution in chloroform. **1** crystallizes in the orthorhombic space group *Pbna* with eight identical formula units and chloroform molecules per unit cell. The phosphorus bound substituent form a close to perfect tetrahedron with C-P-C angles of 108.0(1)° to 111.7(1)°. The P-C<sub>Me</sub> bond lengths are identical within limits of uncertainties (d(P–C14) = 1.780(2) Å) and agree well with values found in [Me<sub>3</sub>P<sup>+</sup>–C<sub>5</sub>H<sub>2</sub>Ph<sub>3</sub>]ClO<sub>4</sub><sup>−</sup> (d(P–C<sub>Me</sub>) = 1.783(2) Å).<sup>1</sup> The P1–C1 bond length amounts to 1.823(2) Å and is slightly shorter than in [Me<sub>2</sub>P<sup>+</sup>(FluH)<sub>2</sub>]I<sup>−</sup> (d(P–C<sub>Flu</sub>) = 1.837(2) Å)<sup>2</sup> which is attributed to the smaller sterical demand of one fluorene moiety in **1**. The bromine atom takes part in weak hydrogen bonding to the proton of the chloroform molecule (d(Br1–H17) = 2.54 Å).

**Characterization and Single Crystal X-ray Analysis of [Me<sub>3</sub>P=Flu] (2).** **2** gives rise to a <sup>31</sup>P NMR resonance at 1.7 ppm. The protons of the phosphorus bound methyl groups in **2** give rise to one doublet at 1.95 ppm and a <sup>3</sup>*J*<sub>HP</sub> coupling constant of 13.4 Hz. Their equivalence indicates a fast rotation around the P–C<sub>Flu</sub> bond. The carbon atom in 9-position of the fluorene moiety shows a doublet at 58.8 Hz in the <sup>13</sup>C NMR spectrum. Its <sup>1</sup>*J*<sub>CP</sub> coupling constant is of 121.1 Hz indicating an increased P–C<sub>Flu</sub> interaction.

Single crystals of **2** were obtained from toluene at −30 °C. It crystallizes in the monoclinic space group *P2<sub>1</sub>/c* with four identical phosphorus ylides and toluene molecules per unit cell. In **2** the P–C<sub>Me</sub> bond lengths (d(P1–C14) = 1.792(2) Å) are of the same magnitude and elongated in

comparison to **1**. The P1–C1 distance amounts to 1.729(2) Å and is in the same range as observed in Me<sub>2</sub>P(=Flu)FluH ( $d(\text{P}-\text{C}_{\text{Flu}}) = 1.724(2)$  Å)<sup>2</sup> and in previously reported cyclopentadienylidene phosphoranes (1.717(2)–1.742(3) Å).<sup>3–6</sup> It represents a longer distance as found in non-stabilized phosphorus ylids (e.g. 1.662(8) Å in Ph<sub>3</sub>P=CH<sub>2</sub>)<sup>7</sup> but a significant elongation in comparison to P–C single bonds found in **2** and Me<sub>2</sub>P(=Flu)FluH ( $d(\text{P}-\text{C}_{\text{FluH}}) = 1.847(2)$  Å).<sup>2</sup> This indicates a significant contribution of both the ylid and ylene resonance structure and therefore a aromatization of the five-membered ring. This is documented by a planar configuration of C1 ( $\Sigma(\angle) = 359.4^\circ$ ) and a obvious contraction of the C1–C2 (1.435(2) Å) and C1–C5 (1.441(2) Å) bond length compared to **1** (1.521(3) and 1.515(3) Å).

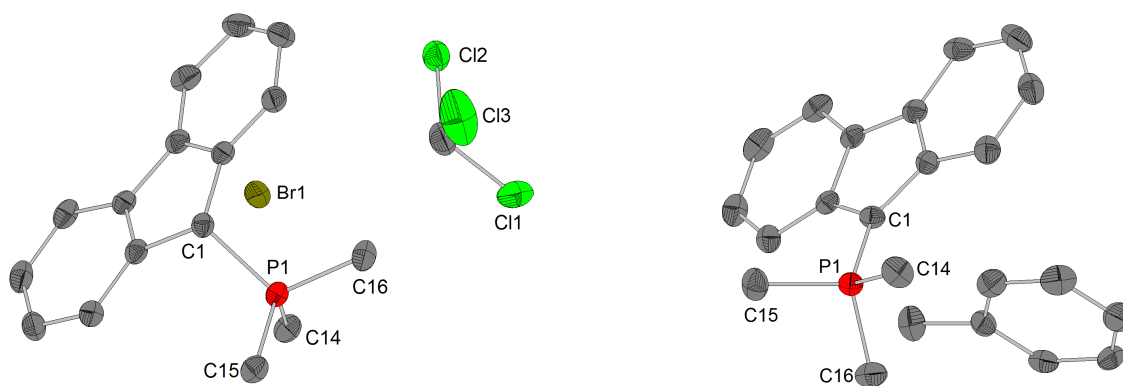

**Figure S1.** Molecular structures of [Me<sub>3</sub>P<sup>+</sup>FluH]Br<sup>−</sup> (**1**, left) and Me<sub>3</sub>P=Flu (**2**, right). Displacement ellipsoids are shown at the 50% probability level. Hydrogen atoms are omitted for clarity. Selected bond lengths (Å) and angles (deg): **1**: P1–C1, 1.823(2); P1–C14, 1.780(2); P1–C15, 1.783(2); P1–C16, 1.785(2); C1–P1–C14, 110.6(1); C1–P1–C15, 108.2(1); C1–P1–C16, 111.7(1); C14–P1–C15, 110.2(1); C14–P1–C16, 108.1(1); C15–P1–C16, 108.0(1). **2**: P1–C1, 1.729(2); P1–C14, 1.792(2); P1–C15, 1.792(2); P1–C16, 1.793(2); C1–P1–C14, 112.7(1); C1–P1–C15, 112.0(1); C1–P1–C16, 113.5(1); C14–P1–C15, 105.9(1); C14–P1–C16, 106.6(1); C15–P1–C16, 105.7(1).

**Table S1.** Crystallographic data for Compounds **1-4**

| Compound                                                                     | 1                                                            | 2                                                                | 3 <sup>a)</sup>                                                               | 4                                                                             |
|------------------------------------------------------------------------------|--------------------------------------------------------------|------------------------------------------------------------------|-------------------------------------------------------------------------------|-------------------------------------------------------------------------------|
| Formula                                                                      | C <sub>16</sub> H <sub>18</sub> P,<br>CHCl <sub>3</sub> , Br | C <sub>16</sub> H <sub>17</sub> P, C <sub>7</sub> H <sub>8</sub> | C <sub>40</sub> H <sub>52</sub> Li <sub>2</sub> O <sub>2</sub> P <sub>2</sub> | C <sub>40</sub> H <sub>50</sub> Li <sub>4</sub> O <sub>2</sub> P <sub>2</sub> |
| Formula weight                                                               | 440.55                                                       | 332.40                                                           | 640.64                                                                        | 652.50                                                                        |
| Crystal system                                                               | orthorhombic                                                 | monoclinic                                                       | triclinic                                                                     | monoclinic                                                                    |
| Space group                                                                  | <i>Pbna</i>                                                  | <i>P2<sub>1</sub>/c</i>                                          | <i>P</i> -1                                                                   | <i>P2<sub>1</sub>/c</i>                                                       |
| Unit cell dimension                                                          |                                                              |                                                                  |                                                                               |                                                                               |
| <i>a</i> (Å)                                                                 | 12.8898(4)                                                   | 14.5317(8)                                                       | 8.9171(6)                                                                     | 8.2904(4)                                                                     |
| <i>b</i> (Å)                                                                 | 13.7001(4)                                                   | 15.7241(6)                                                       | 9.6350(7)                                                                     | 23.4831(15)                                                                   |
| <i>c</i> (Å)                                                                 | 21.7692(7)                                                   | 8.1768(5)                                                        | 10.9153(8)                                                                    | 9.8369(5)                                                                     |
| $\alpha$ (°)                                                                 | 90.00                                                        | 90.00                                                            | 95.220(6)                                                                     | 90.00                                                                         |
| $\beta$ (°)                                                                  | 90.00                                                        | 95.232(5)                                                        | 103.669(6)                                                                    | 110.339(4)                                                                    |
| $\chi$ (°)                                                                   | 90.00                                                        | 90.00                                                            | 90.252(6)                                                                     | 90.00                                                                         |
| <i>V</i> (Å <sup>3</sup> )                                                   | 3844.3(2)                                                    | 1860.60(17)                                                      | 907.14(11)                                                                    | 1795.69(17)                                                                   |
| <i>Z</i>                                                                     | 8                                                            | 4                                                                | 1                                                                             | 2                                                                             |
| Temperature (K)                                                              | 100(2)                                                       | 100(2)                                                           | 100(2)                                                                        | 100(2)                                                                        |
| Wavelength (Å)                                                               | 0.71069                                                      | 0.71069                                                          | 0.71069                                                                       | 0.71069                                                                       |
| Calculated density (g cm <sup>-3</sup> )                                     | 1.522                                                        | 1.187                                                            | 1.173                                                                         | 1.207                                                                         |
| Absorption coefficient (mm <sup>-1</sup> )                                   | 2.633                                                        | 0.148                                                            | 0.152                                                                         | 0.154                                                                         |
| Transmission factors<br>(min./max.)                                          | 0.6691 and<br>0.763                                          | 0.9376 and<br>0.9941                                             |                                                                               | 0.9683 and<br>0.9908                                                          |
| Crystal size (mm <sup>3</sup> )                                              | 0.27 x 0.90 x<br>0.06                                        | 0.44 x 0.06 x<br>0.04                                            | 0.25 x 0.21 x<br>0.10                                                         | 0.21 x 0.12 and<br>0.06                                                       |
| $\theta$ (max) (°)                                                           | 26.72                                                        | 26.76                                                            | 26.99                                                                         | 26.74                                                                         |
| Reflections measured                                                         | 27095                                                        | 14448                                                            | 11997                                                                         | 14701                                                                         |
| Unique reflections                                                           | 4045                                                         | 3918                                                             | 11997                                                                         | 3806                                                                          |
| <i>R</i> <sub>int</sub>                                                      | 0.0491                                                       | 0.0787                                                           |                                                                               | 0.1009                                                                        |
| Number of parameters                                                         | 202                                                          | 221                                                              | 221                                                                           | 236                                                                           |
| <i>R</i> <sub>1</sub> [ <i>F</i> <sup>2</sup> > 2σ( <i>F</i> <sup>2</sup> )] | 0.0329                                                       | 0.0406                                                           | 0.0536                                                                        | 0.0372                                                                        |
| w <i>R</i> <sub>2</sub>                                                      | 0.0680                                                       | 0.0659                                                           | 0.1389                                                                        | 0.0599                                                                        |
| GOOF, <i>S</i>                                                               | 1.095                                                        | 0.806                                                            | 0.985                                                                         | 0.652                                                                         |
| Largest difference peak and<br>hole (e Å <sup>3</sup> )                      | 0.592 and<br>-0.677                                          | 0.231 and<br>-0.287                                              | 0.753 and<br>-0.420                                                           | 0.186 and<br>-0.249                                                           |

<sup>a)</sup> **3** was obtained as a twin (74/26); therefore, an hklf 5-refinement was undertaken.

## NMR Spectra of Compounds 1-4

$^1\text{H}$  NMR of Compound **1** ( $\text{CDCl}_3$ )

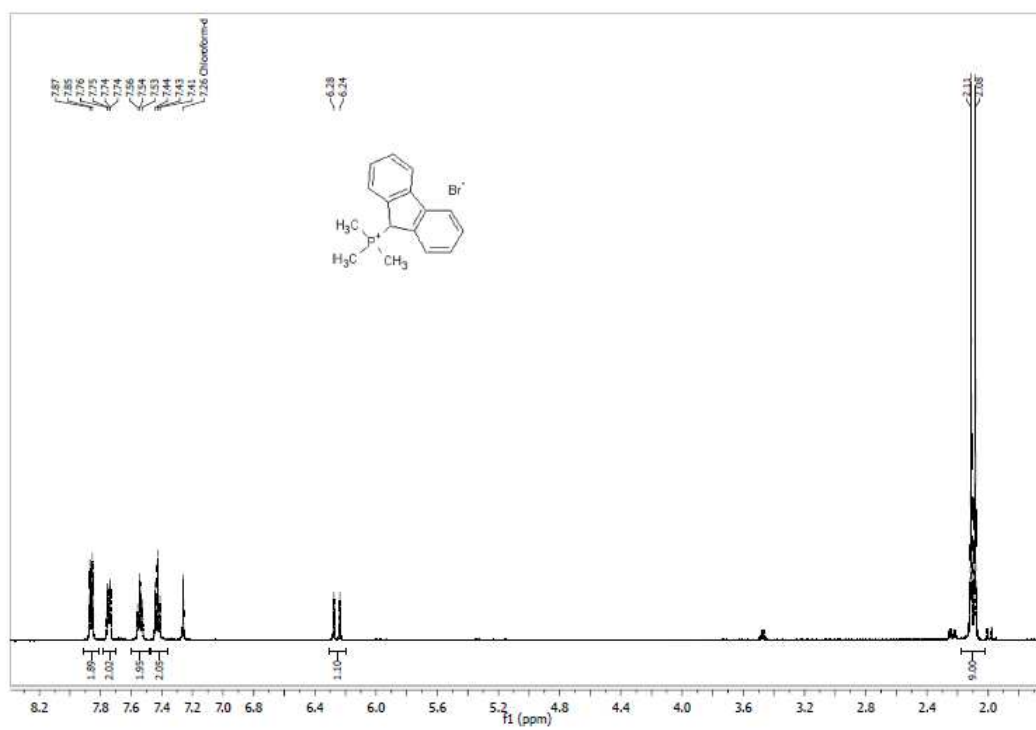

$^{13}\text{C}$  NMR of Compound **1** ( $\text{CDCl}_3$ )

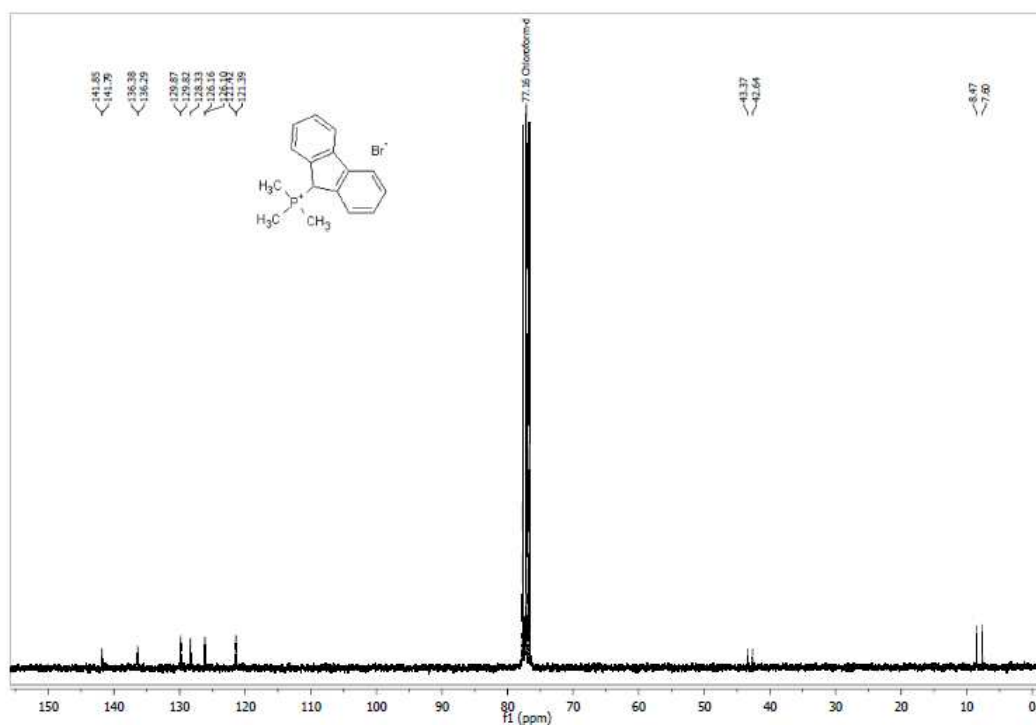

<sup>31</sup>P NMR of Compound **1** (CDCl<sub>3</sub>)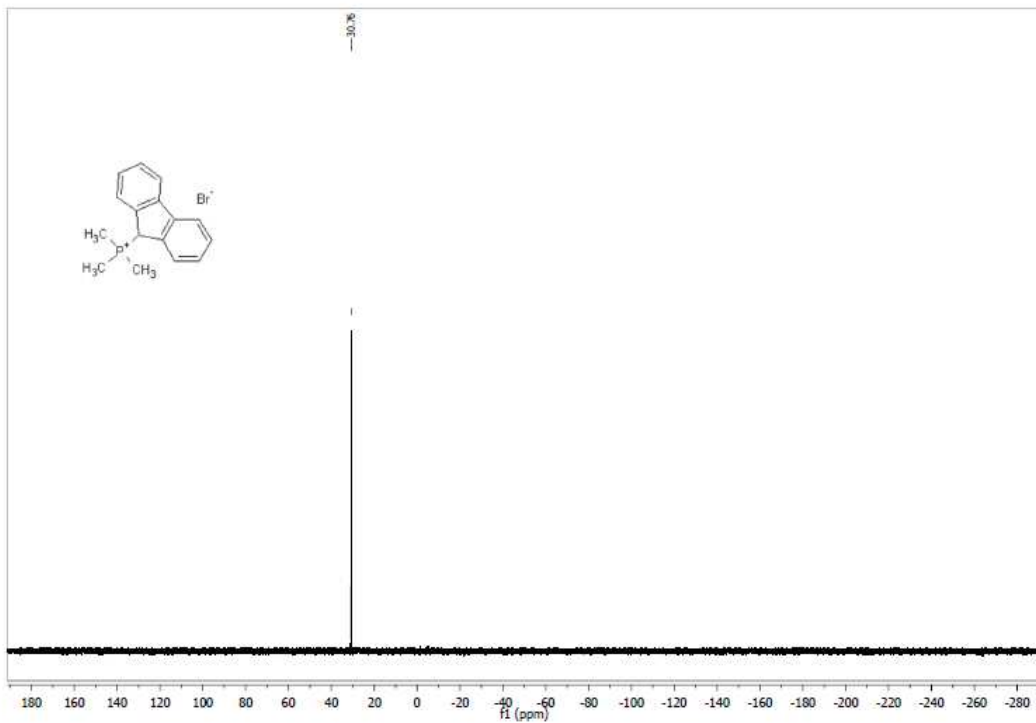<sup>1</sup>H NMR of Compound **2** (THF-d<sub>8</sub>)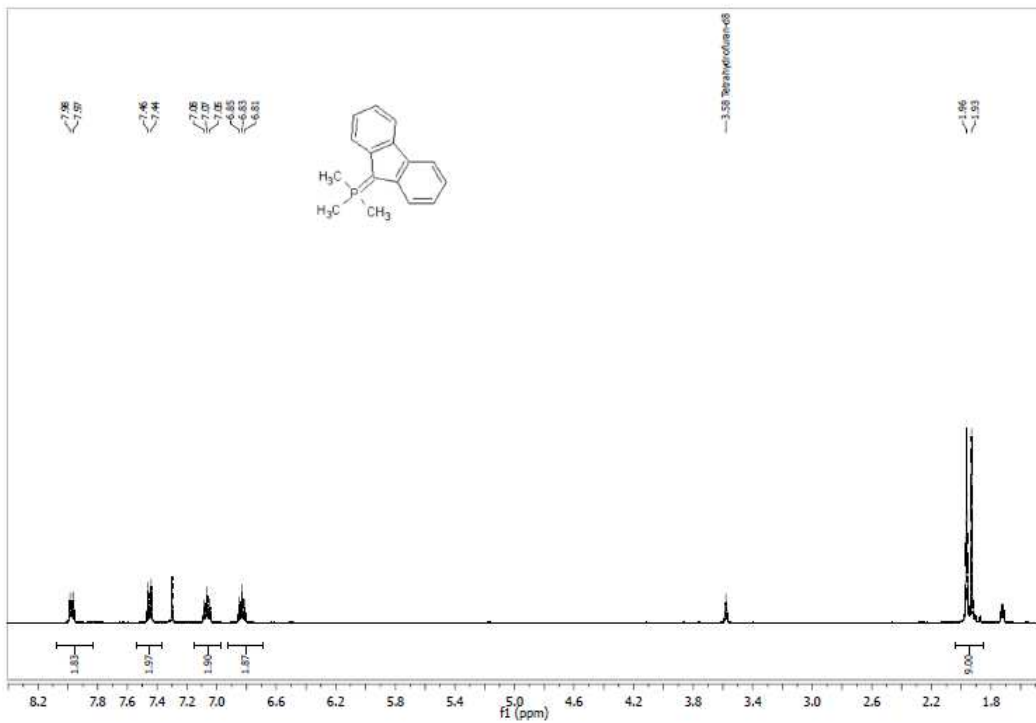

$^{13}\text{C}$  NMR of Compound **2** (THF- $d_8$ )

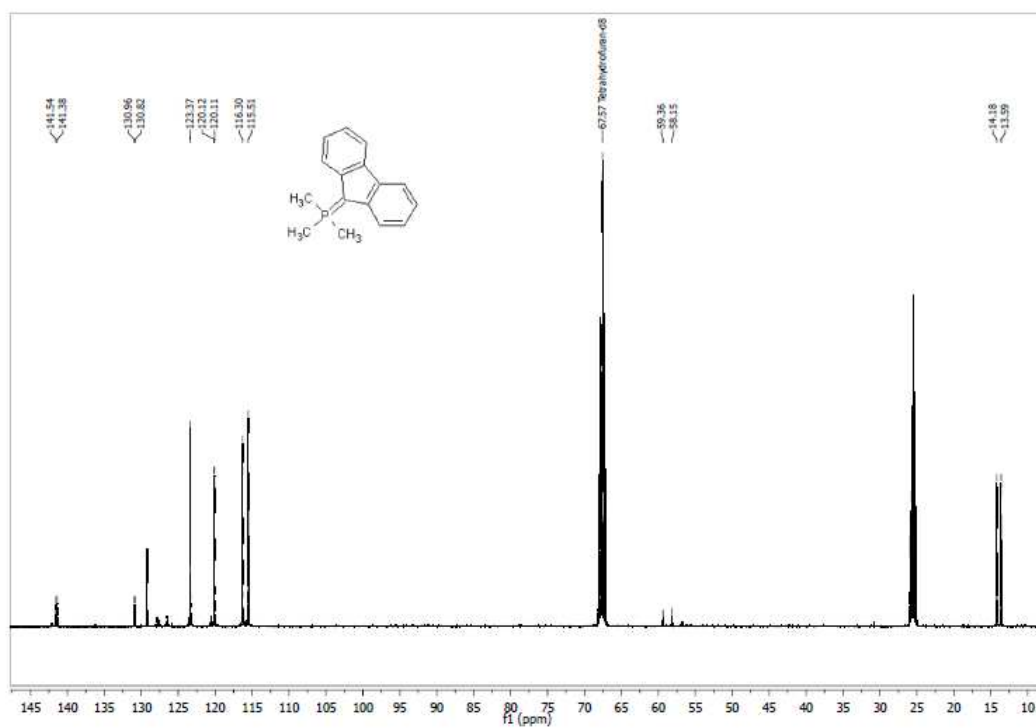

$^{31}\text{P}$  NMR of Compound **2** (THF- $d_8$ )

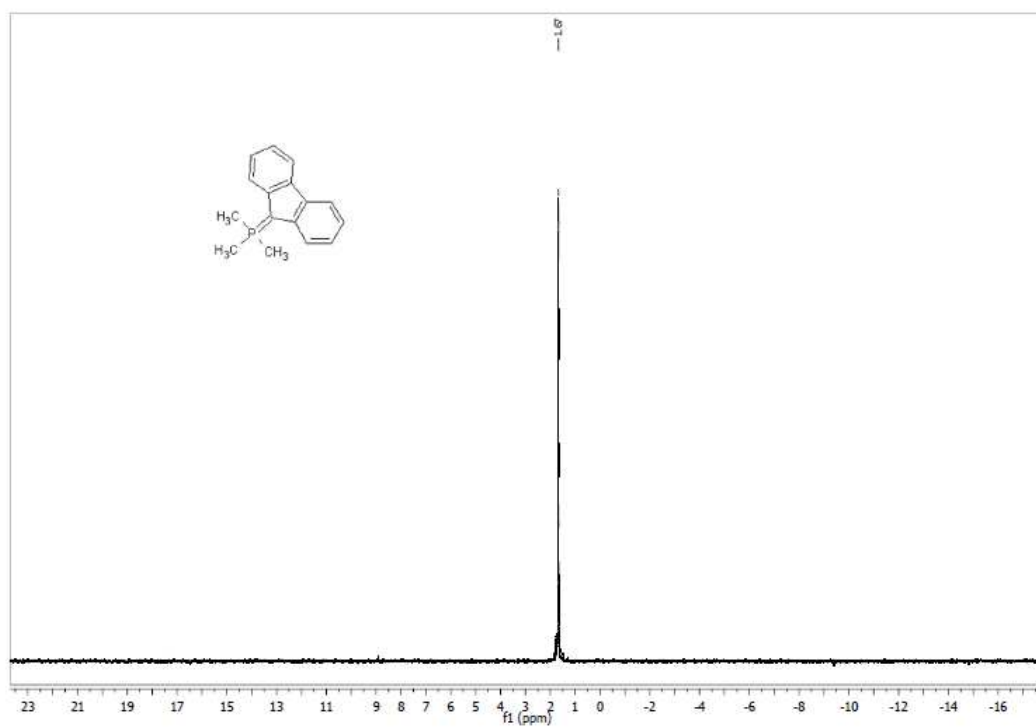

$^1\text{H}$  NMR of Compound **3** (THF- $d_8$ )

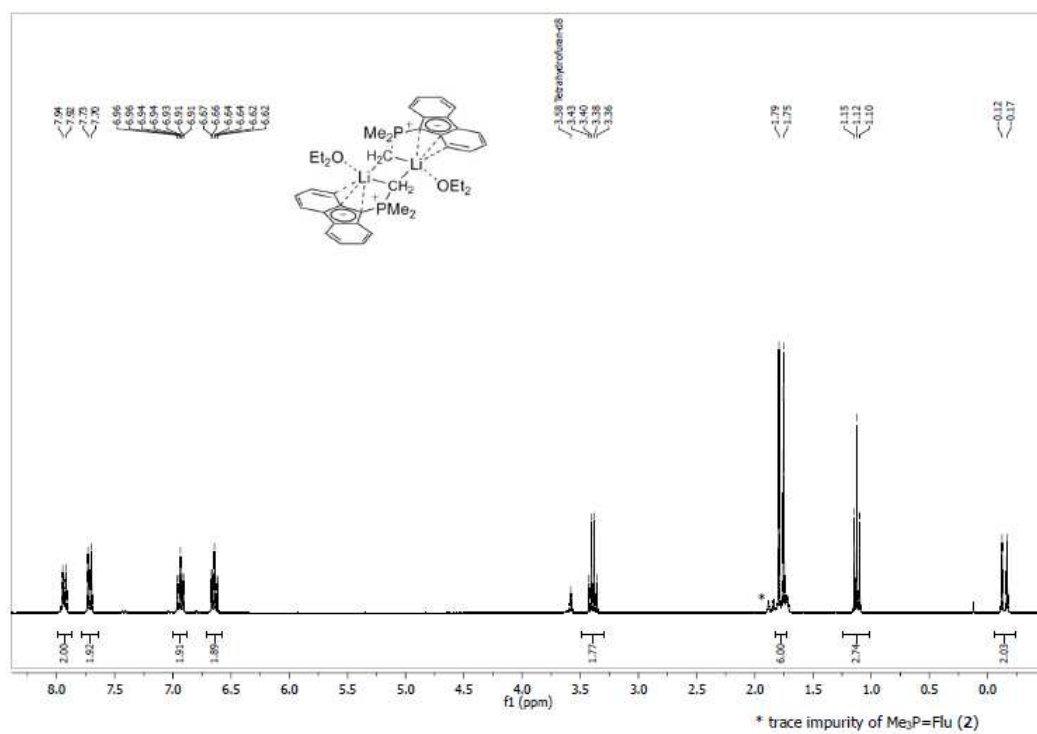

$^{13}\text{C}$  NMR of Compound **3** (THF- $d_8$ )

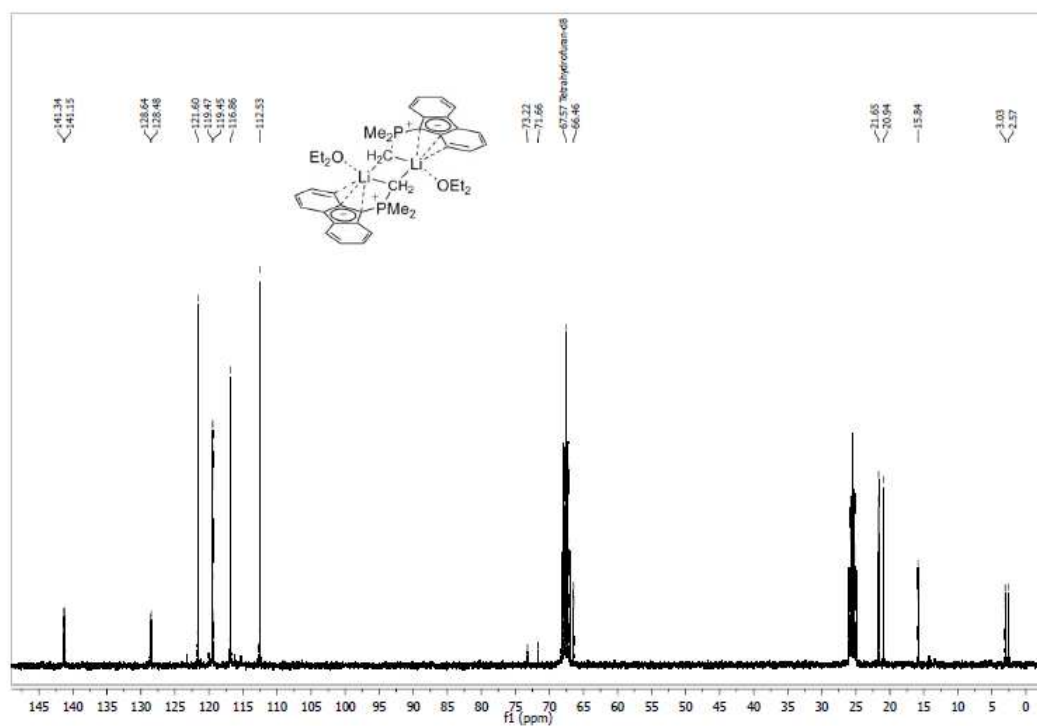



$^{31}\text{P}$  NMR of Compound **3** (THF- $\text{d}_8$ )

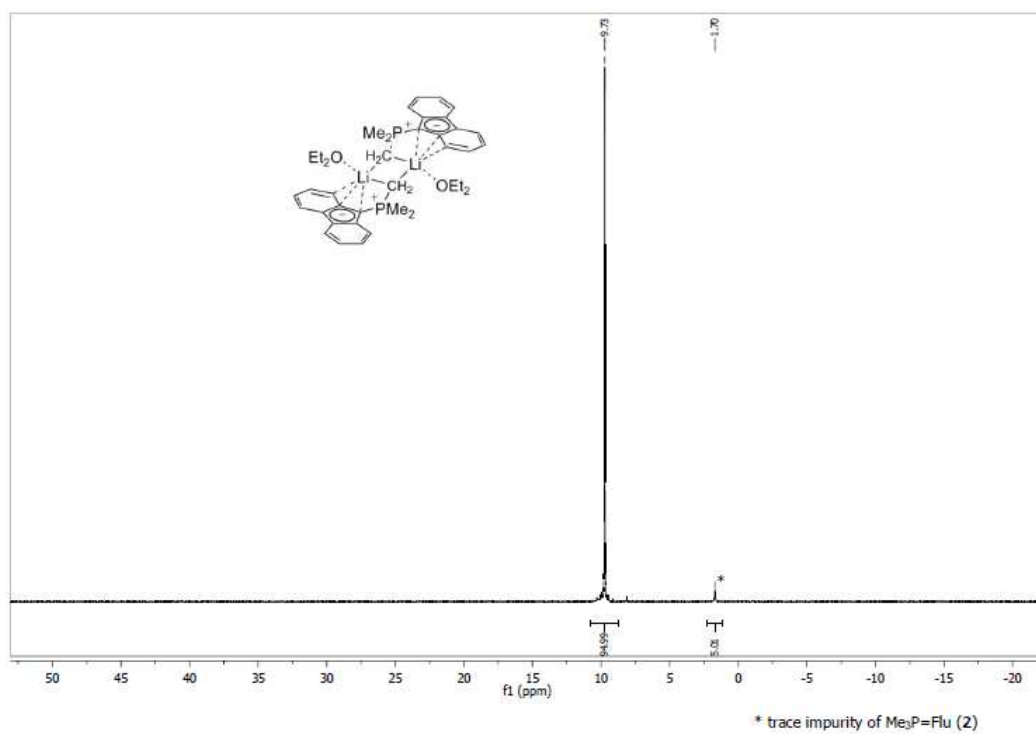

$^7\text{Li}$  NMR of Compound **3** (THF- $\text{d}_8$ )

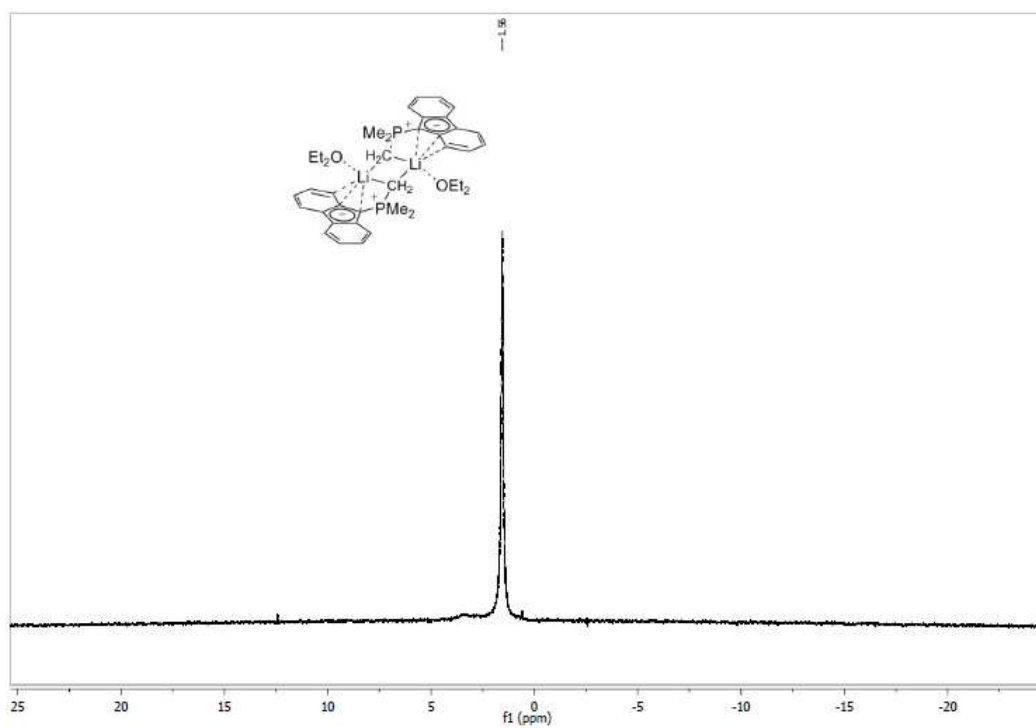

$^1\text{H}$  NMR of Compound **4** (THF- $\text{d}_8$ )

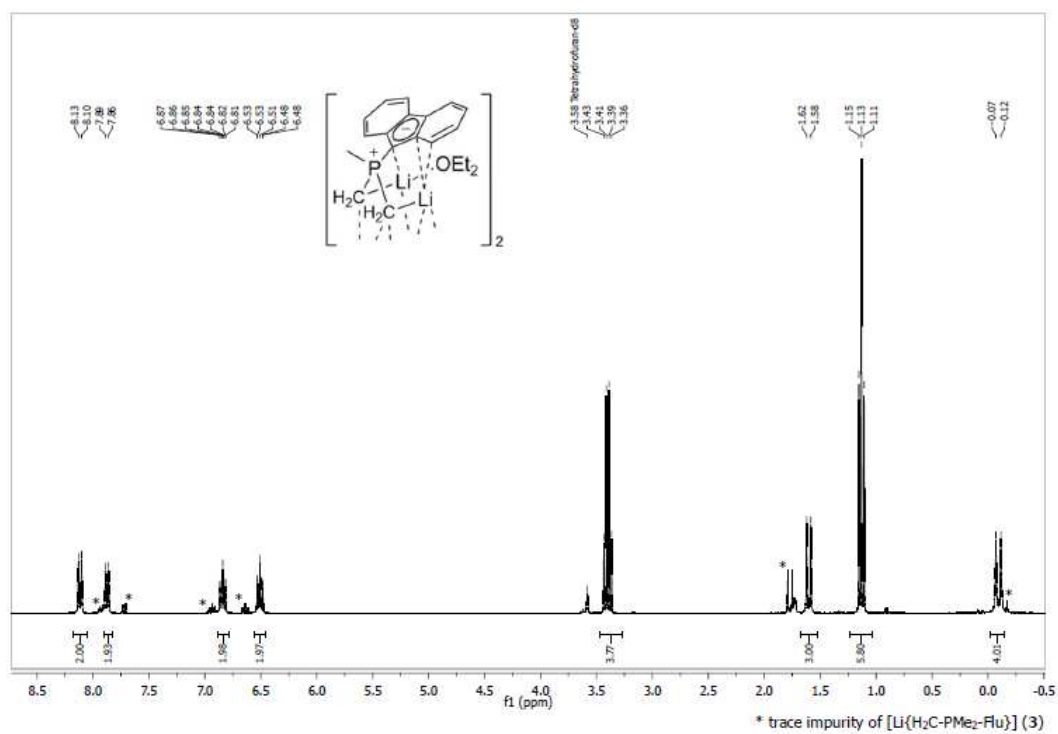

$^{13}\text{C}$  NMR of Compound **4** (THF- $\text{d}_8$ )

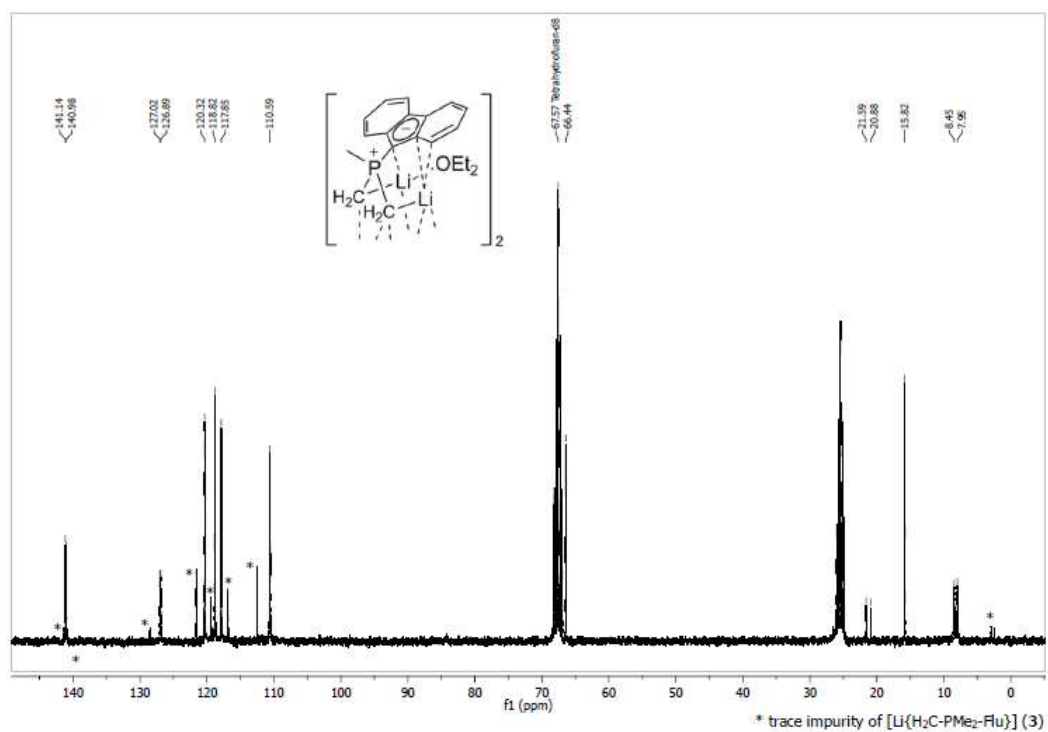

$^{31}\text{P}$  NMR of Compound **4** (THF- $\text{d}_8$ )

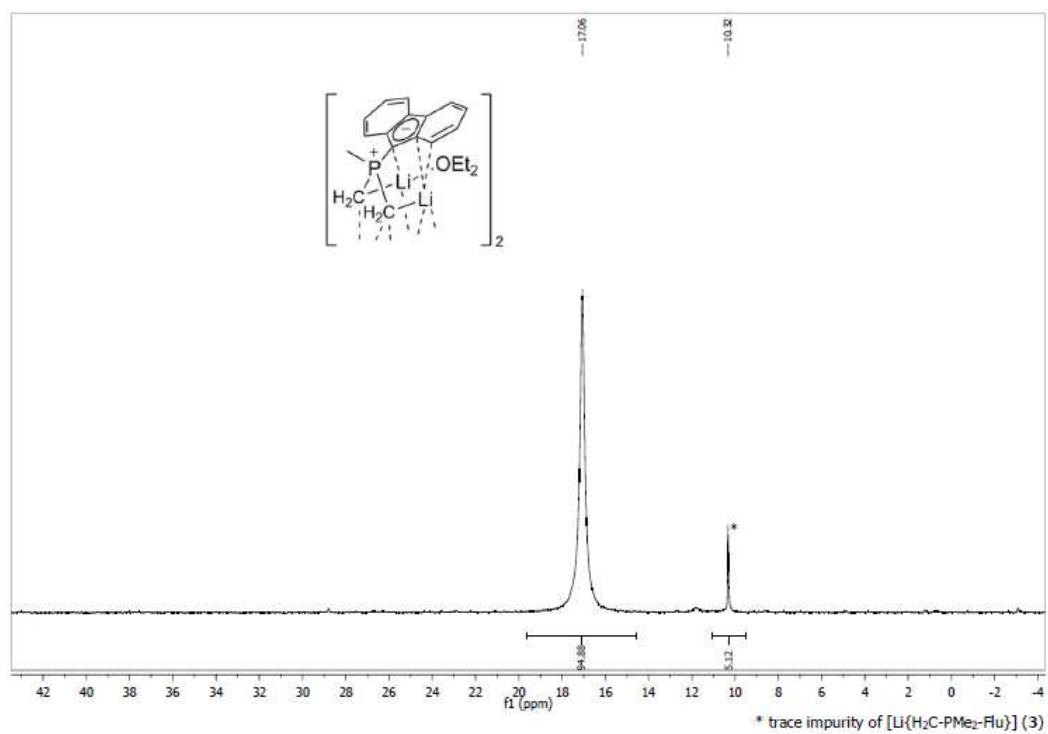

$^7\text{Li}$  NMR of Compound **4** (THF- $\text{d}_8$ )

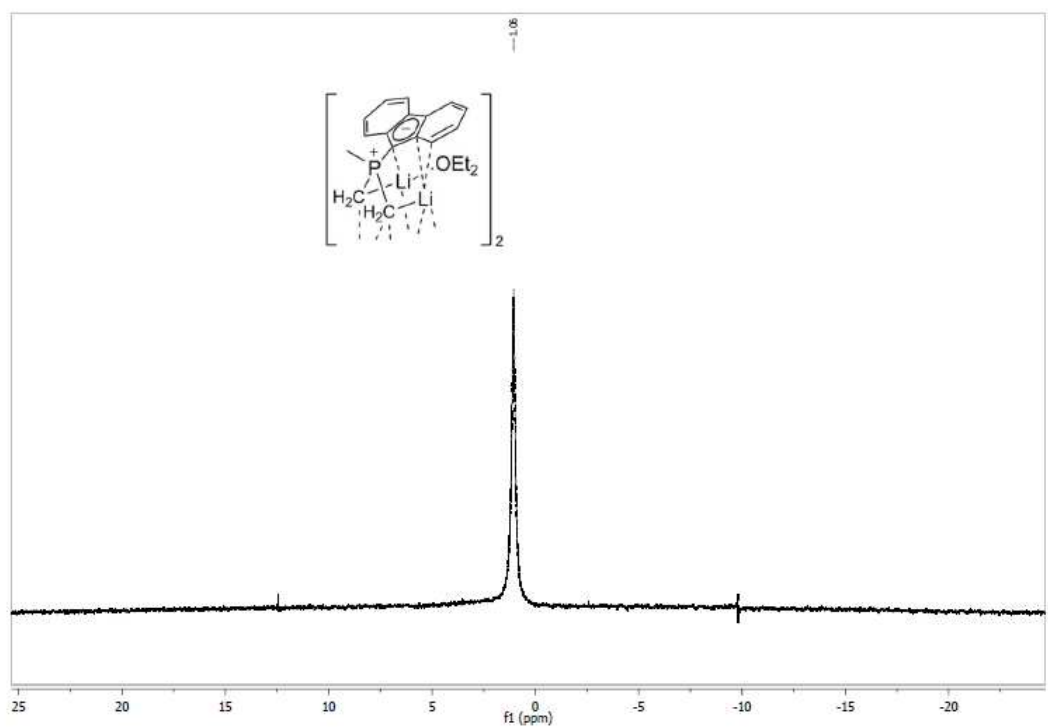

## References

1. T. Xu, W. T. Gong, J.-W. Ye, Y. Lin and G.-L. Ning, *Organometallics*, **2010**, 29, 6744-6748.
2. E. D. Brady, T. P. Hanusa, M. Pink and V. G. Young, *Inorg. Chem.*, **2000**, 39, 6028-6037.
3. C. Lichtenberg, N. S. Hillesheim, M. Elfferding, B. Oelkers and J. Sundermeyer, *Organometallics*, **2012**, 31, 4259-4266.
4. F. G. Schröder, C. Lichtenberg, M. Elfferding and J. Sundermeyer, *Organometallics*, **2013**, 32, 5082-5091.
5. J. H. Brownie, M. C. Baird and H. Schmider, *Organometallics*, **2007**, 26, 1433-1443.
6. H. L. Ammon, G. L. Wheeler and P. H. Watts, *J. Am. Chem. Soc.*, **1973**, 95, 6158-6163.
7. J. C. J. Bart, *Journal of the Chemical Society B: Physical Organic*, **1969**, 350-365.
